CORRECTION

# Correction: Risk of Cancer in Patients with Iron Deficiency Anemia: A Nationwide Population-Based Study

The PLOS ONE Staff

The authors are listed out of order, and the first three authors, Ning Hung, Li-Yu Hu, and Cheng-Che Shen, should be noted as contributing equally to this work. Please view the correct author order, affiliations, and citation here:

Ning Hung<sup>2¶</sup>, Li-Yu Hu<sup>1¶</sup>, Cheng-Che Shen<sup>3,4</sup>, Yu-Wen Hu<sup>2,5,6</sup>, Chiu-Mei Yeh<sup>7</sup>, Chung-Jen Teng<sup>2,6,8</sup>, Ai-Seon Kuan<sup>2</sup>, San-Chi Chen<sup>9</sup>, Tzeng-Ji Chen<sup>2,7</sup>, Chia-Jen Liu<sup>2,6,9\*</sup>

1 Department of Psychiatry, Kaohsiung Veterans General Hospital, Kaohsiung, Taiwan, 2 School of Medicine, National Yang-Ming University, Taipei, Taiwan, 3 Department of Psychiatry, Chiayi Branch, Taichung Veterans General Hospital, Chiayi, Taiwan, 4 Department of information management, National Chung-Cheng University, Chiayi, Taiwan, 5 Cancer Center, Taipei Veterans General Hospital, Taipei, Taiwan, 6 Institute of Public Health, National Yang-Ming University, Taipei, Taiwan, 7 Department of Family Medicine, Taipei Veterans General Hospital, Taipei, Taiwan, 8 Division of Oncology and Hematology, Department of Medicine, Far Eastern Memorial Hospital, New Taipei City, Taiwan, 9 Division of Hematology and Oncology, Department of Medicine, Taipei Veterans General Hospital, Taipei, Taiwan

¶These authors contributed equally to this work.

\*Corresponding author

E-mail: [pures1000@yahoo.com.tw](mailto:pures1000@yahoo.com.tw)

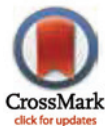

click for updates

## Reference

1. Hung N, Shen C-C, Hu Y-W, Hu L-Y, Yeh C-M, Teng C-J, et al. (2015) Risk of Cancer in Patients with Iron Deficiency Anemia: A Nationwide Population-Based Study. PLoS ONE 10(3): e0119647. doi: [10.1371/journal.pone.0119647](https://doi.org/10.1371/journal.pone.0119647) PMID: [25781632](https://pubmed.ncbi.nlm.nih.gov/25781632/)

## OPEN ACCESS

**Citation:** The PLOS ONE Staff (2015) Correction: Risk of Cancer in Patients with Iron Deficiency Anemia: A Nationwide Population-Based Study. PLoS ONE 10(4): e0125951. doi:10.1371/journal.pone.0125951

**Published:** April 23, 2015

**Copyright:** © 2015 The PLOS ONE Staff. This is an open access article distributed under the terms of the [Creative Commons Attribution License](https://creativecommons.org/licenses/by/4.0/), which permits unrestricted use, distribution, and reproduction in any medium, provided the original author and source are credited.
